# Supplementary material for: Discovering the indigenous microbial communities associated with the natural fermentation of sap from the cider gum Eucalyptus gunnii
Source: PubMed Central journal article supplement (PMC7477236; doi:10.1038/s41598-020-71663-x), 2020-09-07
Supplement: 41598_2020_71663_MOESM1_ESM.pdf [file 41598_2020_71663_MOESM1_ESM.pdf]

**Discovering the indigenous microbial communities associated with the natural fermentation of sap from the cider gum *Eucalyptus gunnii***

Cristian Varela, Joanna Sundstrom, Kathleen Cuijvers, Vladimir Jiranek, Anthony Borneman

**Table S1.** Sequences and abundances for all bacterial OTUs.**Table S2.** Relative abundance for all bacterial phyla (%).

| Phylum             | Overall | Location                    |                     |                      |                    | Niche              |                    | Date        |             |
|--------------------|---------|-----------------------------|---------------------|----------------------|--------------------|--------------------|--------------------|-------------|-------------|
|                    |         | Five Rivers -<br>Serpentine | Skullbone<br>Plains | Trawtha<br>Makuminya | Bark               | Sap                | Soil               | Nov<br>2016 | Jan<br>2017 |
| p__Acidobacteria   | 0.087   | 0.032                       | 0.091               | 0.111                | 0.116              | 0.066              | 0.094              | 0.079       | 0.094       |
| p__Actinobacteria  | 1.952   | 3.677                       | 0.133               | 1.558                | 1.651              | 2.458              | 0.545              | 0.187       | 3.634       |
| p__Armatimonadetes | 0.009   | 0.000                       | 0.000               | 0.015                | 0.002              | 0.004              | 0.055              | 0.013       | 0.005       |
| p__Bacteroidetes   | 1.348   | 0.098                       | 3.347               | 1.484                | 1.721              | 1.000              | 1.831              | 1.466       | 1.236       |
| p__Chlamydiae      | 0.004   | 0.000                       | 0.000               | 0.007                | 0.000              | 0.008              | 0.000              | 0.000       | 0.009       |
| p__Cyanobacteria   | 0.066   | 0.000                       | 0.000               | 0.111                | 0.000              | 0.090              | 0.148              | 0.056       | 0.075       |
| p__Fibrobacteres   | 0.003   | 0.000                       | 0.000               | 0.005                | 0.000 <sup>b</sup> | 0.000 <sup>b</sup> | 0.026 <sup>a</sup> | 0.006       | 0.000       |
| p__Firmicutes      | 3.199   | 2.181                       | 1.620               | 4.014                | 1.512              | 3.380              | 7.276              | 3.208       | 3.190       |
| p__Patescibacteria | 0.023   | 0.003                       | 0.051               | 0.026                | 0.025 <sup>b</sup> | 0.010 <sup>b</sup> | 0.075 <sup>a</sup> | 0.018       | 0.027       |
| p__Planctomycetes  | 0.017   | 0.019                       | 0.000               | 0.020                | 0.024              | 0.003              | 0.059              | 0.025       | 0.010       |
| p__Proteobacteria  | 64.722  | 63.478                      | 62.988              | 65.675               | 71.489             | 59.878             | 66.895             | 69.042      | 60.603      |
| p__Spirochaetes    | 0.006   | 0.000                       | 0.000               | 0.010                | 0.000 <sup>b</sup> | 0.000 <sup>b</sup> | 0.052 <sup>a</sup> | 0.013       | 0.000       |
| p__Verrucomicrobia | 0.285   | 0.000                       | 0.021               | 0.474                | 0.013              | 0.440              | 0.374              | 0.570       | 0.013       |
| Unassigned         | 28.279  | 30.513                      | 31.749              | 26.489               | 23.448             | 32.662             | 22.570             | 25.317      | 31.104      |

Different letters indicate statistically significant differences ( $p < 0.05$  according to Kruskal test)

**Table S3.** Sequences and abundances for all fungal OTUs.**Table S4.** Relative abundance for all fungal classes (%).

| Class                         | Overall | Location                    |                     |                      |                    | Niche              |                    | Date               |                    |
|-------------------------------|---------|-----------------------------|---------------------|----------------------|--------------------|--------------------|--------------------|--------------------|--------------------|
|                               |         | Five Rivers -<br>Serpentine | Skullbone<br>Plains | Trawtha<br>Makuminya | Bark               | Sap                | Soil               | Nov<br>2016        | Jan<br>2017        |
| <i>c__Agaricomycetes</i>      | 0.201   | 0.608                       | 0.004               | 0.058                | 0.103 <sup>b</sup> | 0.288 <sup>a</sup> | 0.100 <sup>b</sup> | 0.062 <sup>b</sup> | 0.335 <sup>a</sup> |
| <i>c__Cystobasidiomycetes</i> | 0.547   | 1.083                       | 0.012               | 0.418                | 0.008 <sup>b</sup> | 1.004 <sup>a</sup> | 0.054 <sup>b</sup> | 1.062              | 0.056              |
| <i>c__Dothideomycetes</i>     | 7.279   | 15.940 <sup>a</sup>         | 0.842 <sup>b</sup>  | 4.712 <sup>b</sup>   | 4.105 <sup>b</sup> | 9.509 <sup>a</sup> | 6.451 <sup>b</sup> | 3.711              | 10.682             |
| <i>c__Eurotiomycetes</i>      | 0.971   | 0.702 <sup>b</sup>          | 1.977 <sup>a</sup>  | 0.874 <sup>b</sup>   | 1.044 <sup>a</sup> | 1.095 <sup>a</sup> | 0.204 <sup>b</sup> | 0.703              | 1.227              |
| <i>c__Leotiomycetes</i>       | 1.459   | 0.663                       | 2.697               | 1.553                | 2.262              | 1.236              | 0.140              | 1.832              | 1.105              |
| <i>c__Microbotryomycetes</i>  | 0.295   | 0.688                       | 0.060               | 0.166                | 0.026              | 0.253              | 1.266              | 0.418              | 0.178              |
| <i>c__Mortierellomycetes</i>  | 0.685   | 2.441                       | 0.005               | 0.026                | 0.093 <sup>a</sup> | 1.219 <sup>a</sup> | 0.000 <sup>b</sup> | 0.032              | 1.308              |
| <i>c__Mucoromycetes</i>       | 0.001   | 0.000 <sup>b</sup>          | 0.010 <sup>a</sup>  | 0.000 <sup>b</sup>   | 0.004              | 0.000              | 0.000              | 0.000              | 0.002              |
| <i>c__Orbiliomycetes</i>      | 0.064   | 0.002                       | 0.006               | 0.106                | 0.184              | 0.001              | 0.002              | 0.129              | 0.002              |
| <i>c__Pezizomycetes</i>       | 0.062   | 0.000                       | 0.443               | 0.006                | 0.179              | 0.000              | 0.000              | 0.008              | 0.113              |
| <i>c__Saccharomycetes</i>     | 38.177  | 37.748                      | 31.997              | 39.735               | 42.216             | 38.148             | 26.599             | 38.840             | 37.545             |
| <i>c__Sordariomycetes</i>     | 0.508   | 0.428 <sup>a</sup>          | 0.158 <sup>b</sup>  | 0.622 <sup>a</sup>   | 0.124 <sup>b</sup> | 0.808 <sup>a</sup> | 0.273 <sup>b</sup> | 0.771              | 0.257              |
| <i>c__Tremellomycetes</i>     | 2.487   | 3.322                       | 0.864               | 2.461                | 0.789 <sup>b</sup> | 3.661 <sup>a</sup> | 2.132 <sup>a</sup> | 2.202              | 2.759              |
| <i>c__Wallemiomycetes</i>     | 0.021   | 0.003                       | 0.067               | 0.020                | 0.002 <sup>b</sup> | 0.015 <sup>b</sup> | 0.107 <sup>a</sup> | 0.010              | 0.033              |
| Unassigned                    | 47.240  | 36.373 <sup>b</sup>         | 60.859 <sup>a</sup> | 49.243 <sup>b</sup>  | 48.863             | 42.765             | 62.673             | 50.221             | 44.398             |

Different letters indicate statistically significant differences ( $p < 0.05$  according to Kruskal test)

**Table S5.** Most abundant fungal species (%).

| Species                                     | Overall |
|---------------------------------------------|---------|
| s__ <i>Kregervanrija delftensis</i>         | 9.308   |
| s__ <i>Hanseniaspora valbyensis</i>         | 6.684   |
| s__ <i>Lachancea quebecensis</i>            | 3.182   |
| s__ <i>Citeromyces hawaiiensis</i>          | 2.465   |
| s__ <i>Schwanniomyces pseudopolymorphus</i> | 2.436   |
| s__ <i>Lachancea cidri</i>                  | 2.204   |
| s__ <i>Torulaspota globosa</i>              | 2.082   |
| s__ <i>Pichia kluyveri</i>                  | 1.865   |
| s__ <i>Hormonema macrosporum</i>            | 1.348   |
| s__ <i>Hanseniaspora thailandica</i>        | 1.285   |
| s__ <i>Candida salmanticensis</i>           | 1.193   |
| s__ <i>Penidiella carpentariae</i>          | 0.915   |
| s__ <i>Cladosporium delicatulum</i>         | 0.709   |
| s__ <i>Bettsia alvei</i>                    | 0.395   |
| s__ <i>Holtermanniella takashimae</i>       | 0.146   |
| s__ <i>Cercophora vinosa</i>                | 0.109   |
| Unassigned                                  | 47.240  |
| Other <sup>1</sup>                          | 11.770  |
| Ambiguous taxa                              | 4.666   |

<sup>1</sup> identified species with abundance lower than 0.1%

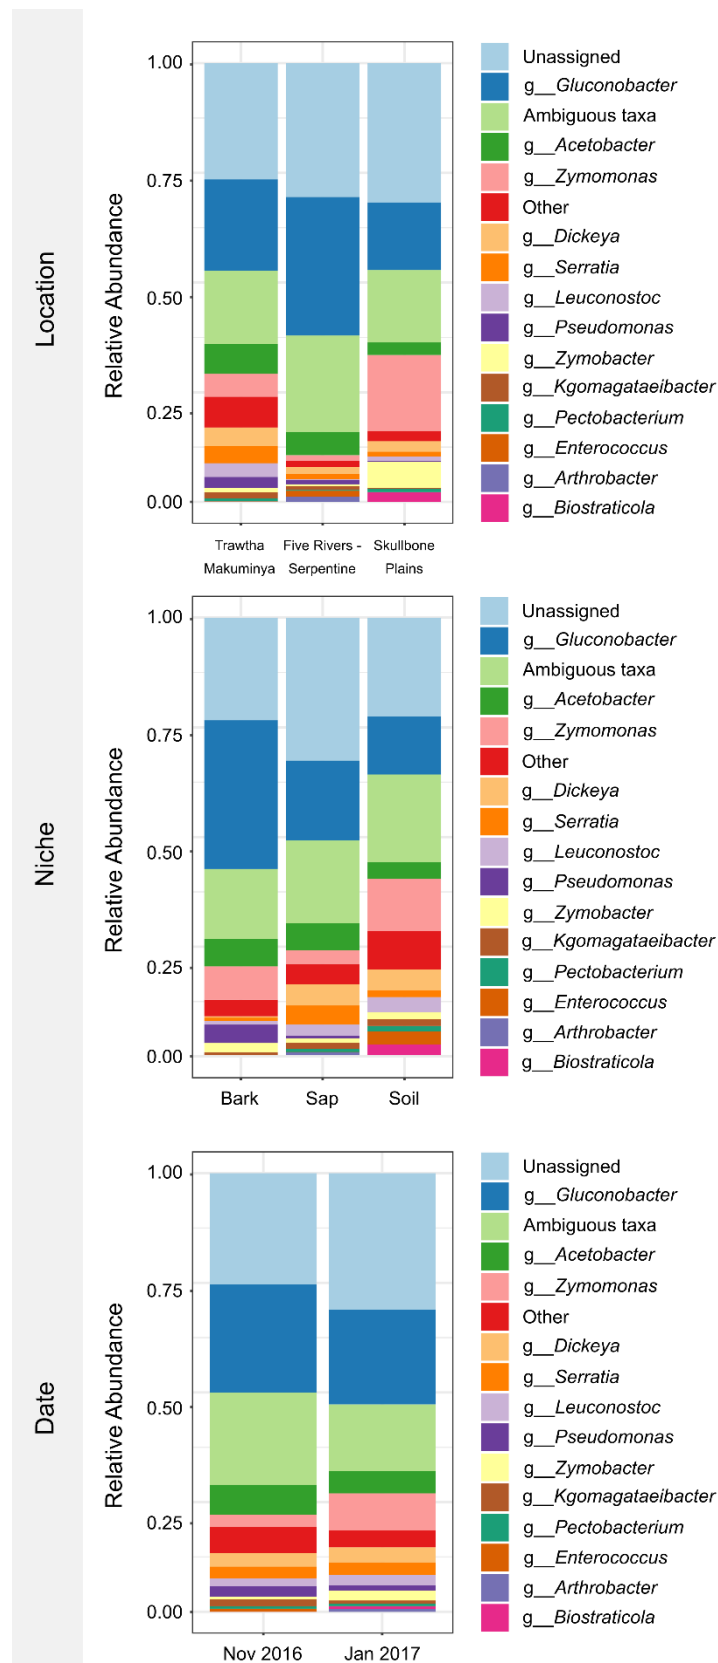

**Figure S1.** Relative abundance for the most abundant bacterial genera associated with *Eucalyptus gunnii* according to geographical location, ecological niche or sampling date.

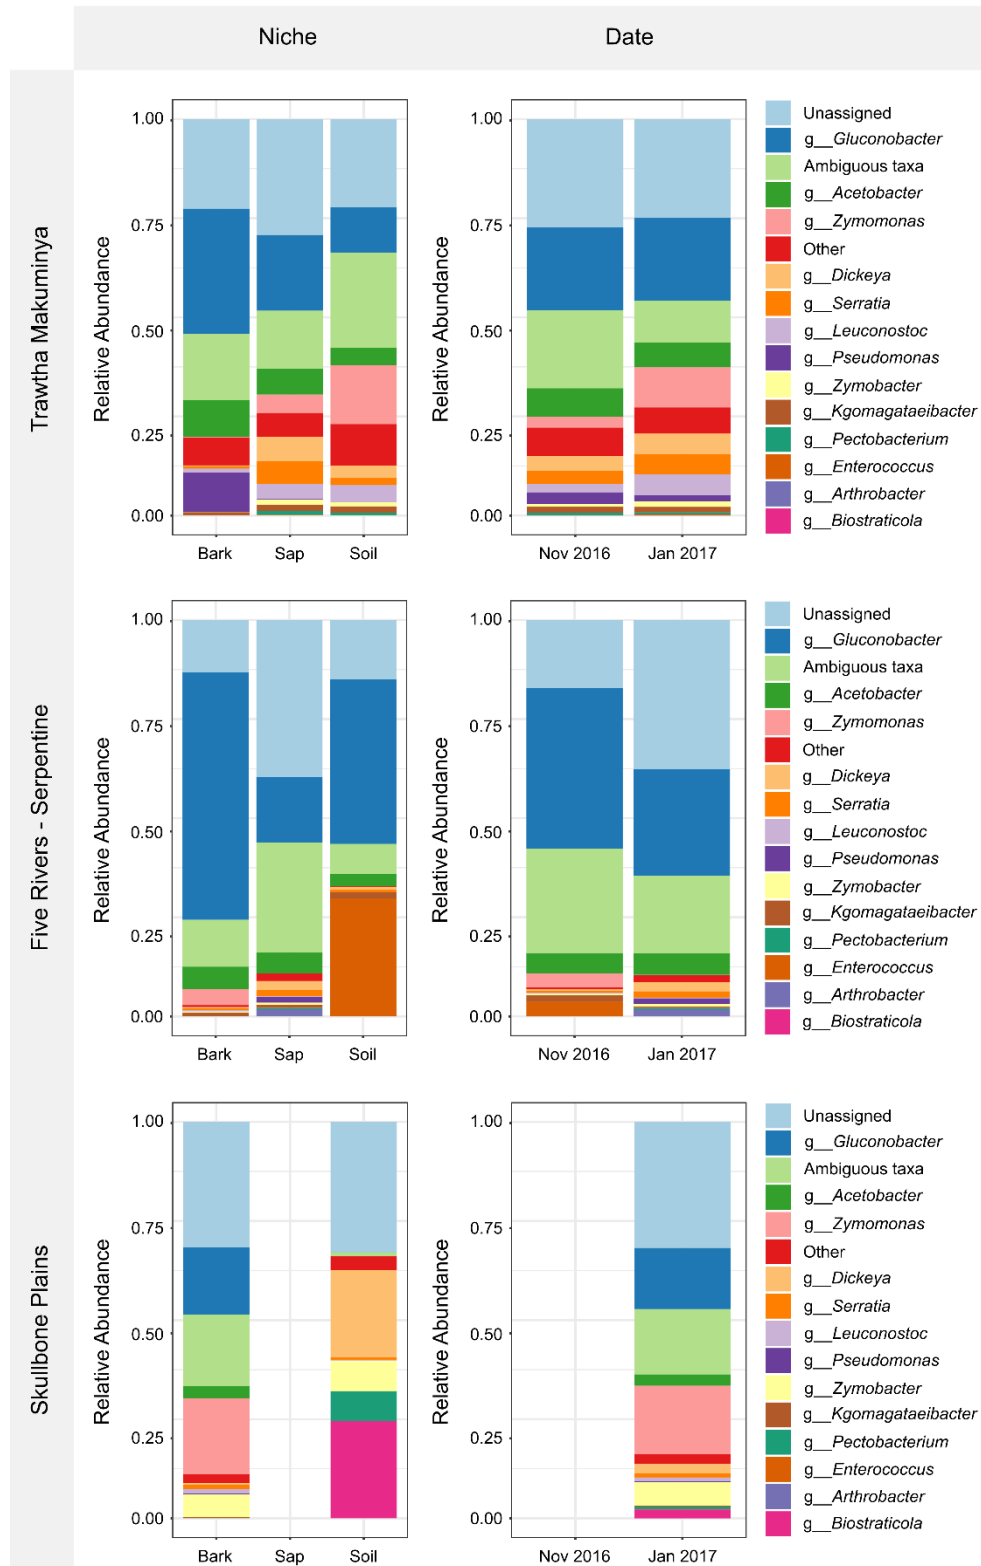

**Figure S2.** Relative abundance for the most abundant bacterial genera associated with *Eucalyptus gunnii* in Trawtha Makuminya, Skullbone Plains and Five Rivers - Serpentine according to ecological niche, and sampling date.

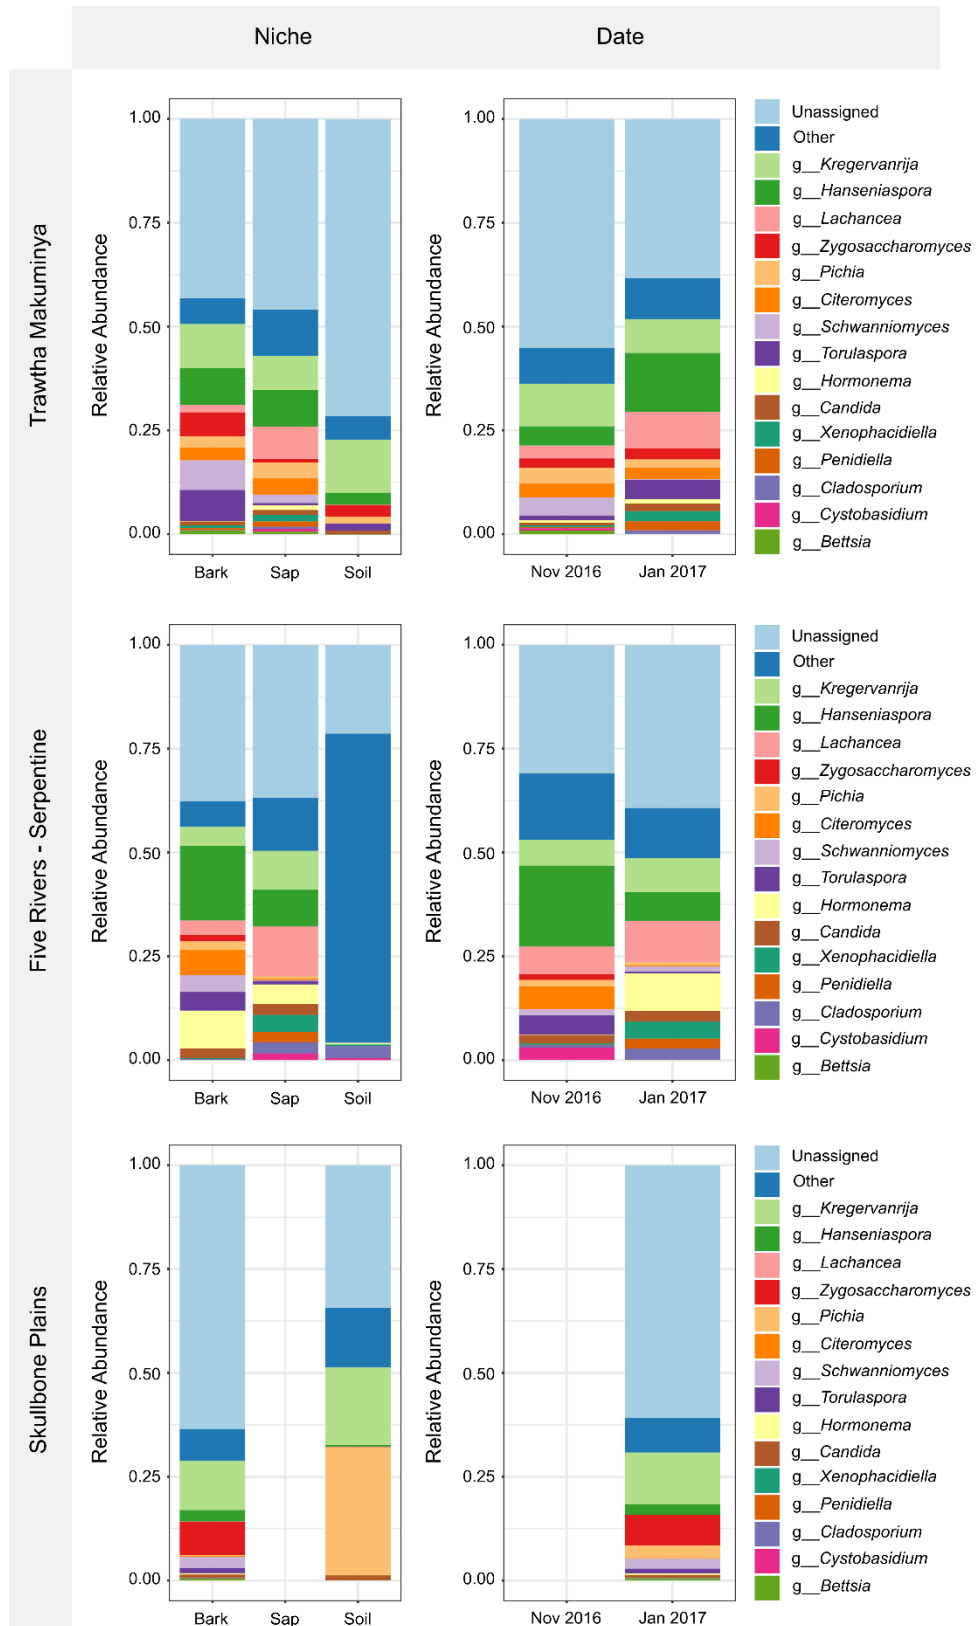

**Figure S3.** Relative abundance for the 15 most abundant fungal genera associated with *Eucalyptus gunnii* according to geographical location, ecological niche, and sampling date.

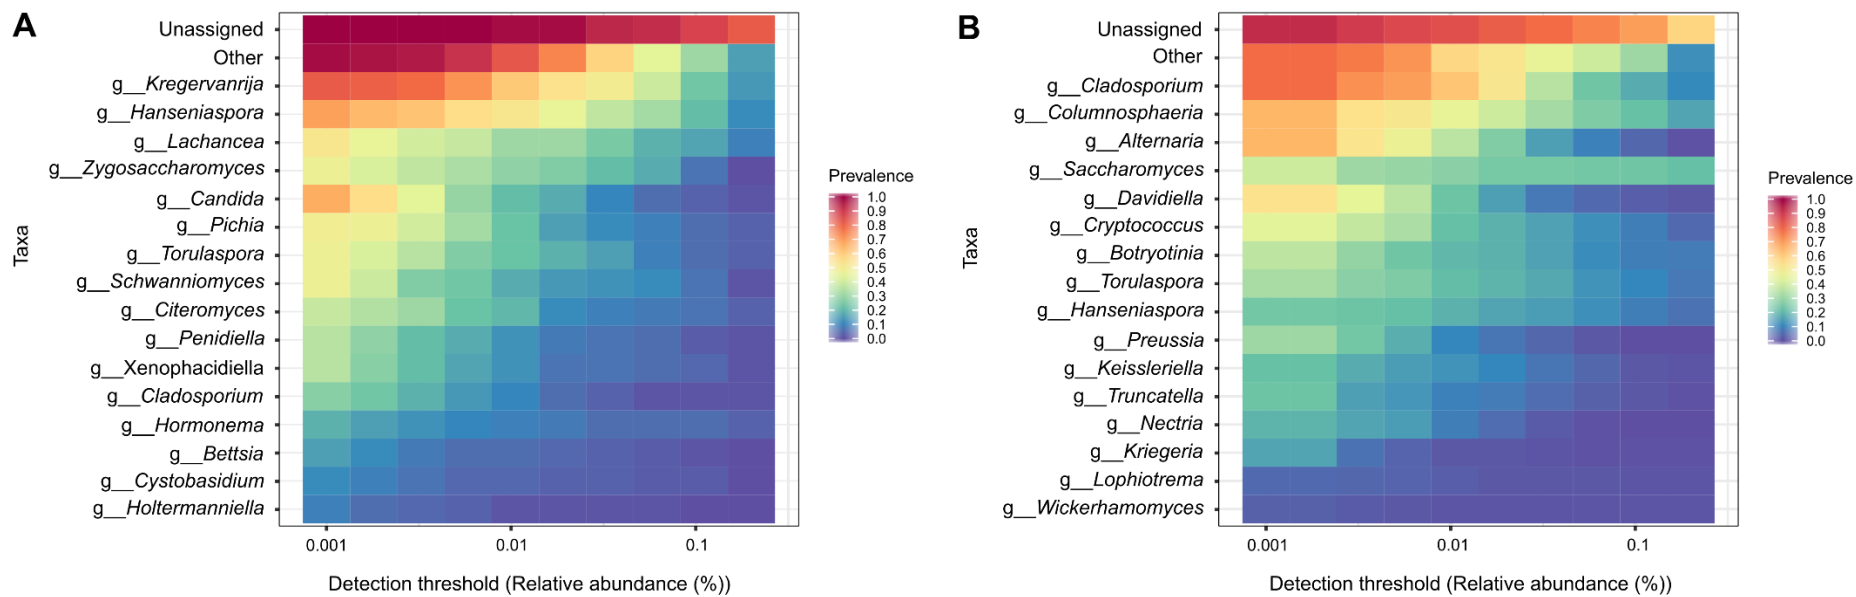

**Figure S4.** Most prevalent fungal genera associated with *Eucalyptus gunnii* (A) and with *Vitis vinifera* (B). *V. vinifera* data from Morrison-Whittle and Goddard<sup>33,34</sup>.



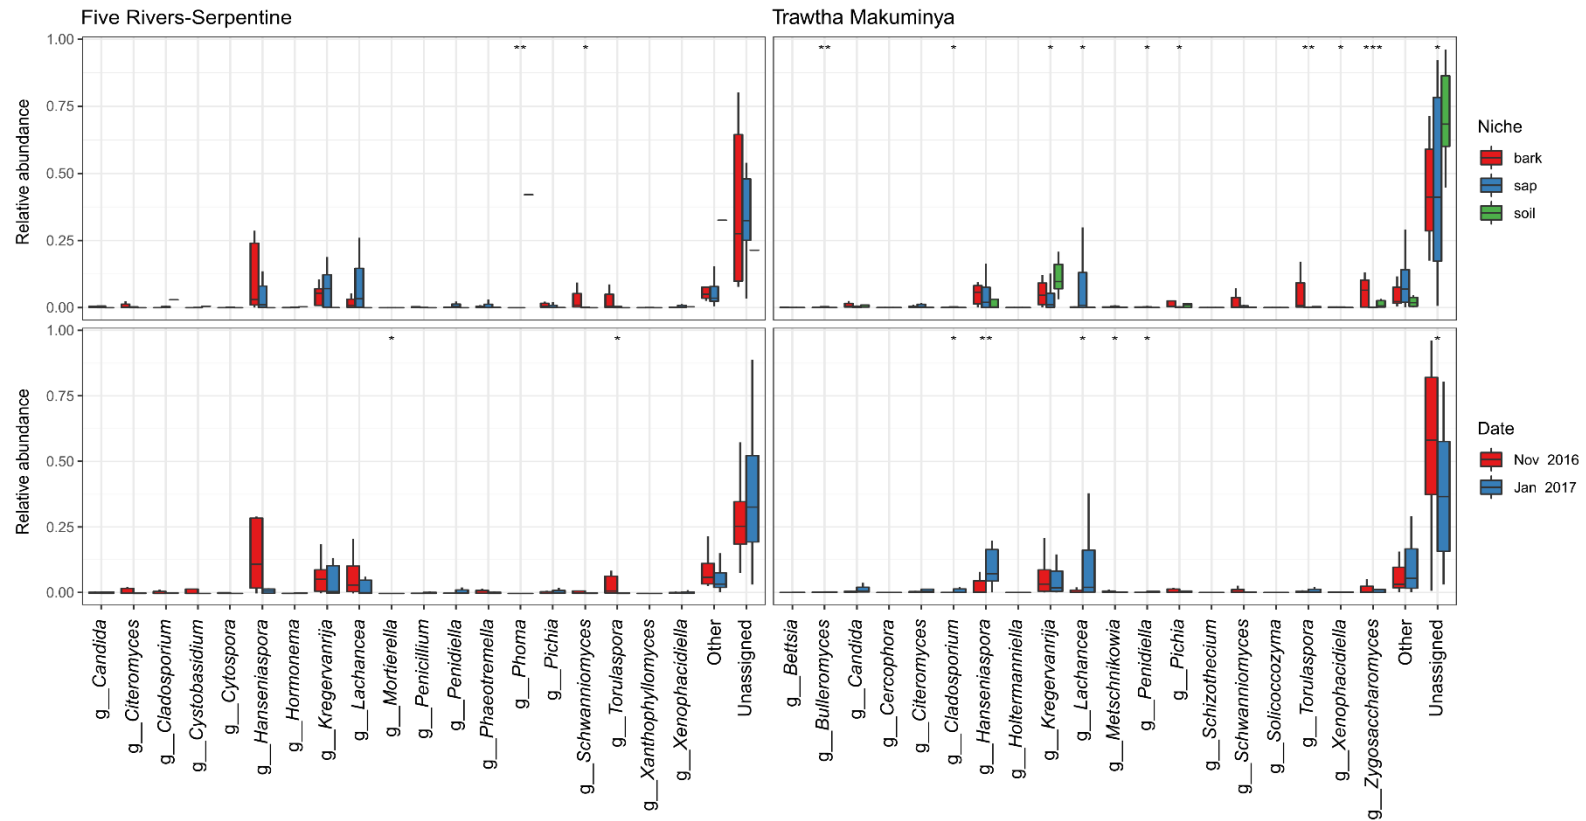

**Figure S5.** Boxplots showing relative abundance for the 15 most abundant fungal genera in Trawtha Makuminya and Five Rivers - Serpentine according to ecological niche and sampling date. Stars indicate statistically significant differences according to the Kruskal–Wallis test (\*  $p < 0.05$ ; \*\*  $p < 0.01$ ; \*\*\*  $p < 0.001$ ).
